# Supplementary material for: Factors Predicting Training Delays and Attrition of Recruits during Basic Military Training
Source: MDPI journal article supplement (doi:10.3390/ijerph19127271), 2022-06-14
Supplement: s1 [file s1]

**Supplementary Table S1:** Recruit characteristics at week 1 of BMT.

| Characteristics                                                      | ON-P             | DELCOM          | DIS             |
|----------------------------------------------------------------------|------------------|-----------------|-----------------|
| N                                                                    | 36               | 7               | 3               |
| Men, <i>n</i> (%)                                                    | 31 (86%)         | 5 (71%)         | 1 (33%)         |
| Age, year                                                            | 24.1 ± 6.8       | 27.7 ± 9.1      | 23.3 ± 6.8      |
| Height, cm                                                           | 178.0 ± 9.7      | 170.6 ± 11.5    | 166.7 ± 4.2     |
| Weight, kg                                                           | 76.0 ± 14.6      | 73.7 ± 18.1     | 70.2 ± 11.2     |
| BMI (kg/m <sup>2</sup> )                                             | 23.9 ± 3.3       | 25.0 ± 3.4      | 25.2 ± 3.1      |
| Injuries, <i>n</i>                                                   | 11               | 5               | 1               |
| Recruits with injuries, <i>n</i>                                     | 6 (16.7%)        | 5               | 1               |
| <b>Objective measures</b>                                            |                  |                 |                 |
| Predicted $\dot{V}O_{2max}$ , mL·kg <sup>-1</sup> ·min <sup>-1</sup> | 43.2 ± 4.4       | 42.1 ± 3.3      | 37.4 ± 2.1 *    |
| Push ups completed, <i>n</i>                                         | 32.8 ± 10.9      | 30.8 ± 8.4      | 10.0 ± 8.2 *†   |
| <u>Cortisol (ng/mL)</u>                                              |                  |                 |                 |
| Waking                                                               | 4.9 ± 1.9        | 4.2             | 6.9             |
| 30 min post-waking                                                   | 6.4 ± 2.4        | 6.9             | 8.6             |
| Bedtime                                                              | 0.6 ± 0.4        | 0.7 ± 0.4       | 0.3             |
| <u>Testosterone (pg/mL)</u>                                          |                  |                 |                 |
| Waking                                                               | 180.4 ± 51.5     | 156.0 ± 86.2    | 161.3           |
| 30 min post-waking                                                   | 158.6 ± 45.9     | 171.7 ± 83.2    | 143.9           |
| Bedtime                                                              | 109.6 ± 41.8     | 106.8 ± 38.6    | 87.8            |
| Steps per week, <i>n</i>                                             | 108,608 ± 16,074 | 82,376 ± 28,121 | 79984           |
| <b>Subjective measures</b>                                           |                  |                 |                 |
| <u>Short Stress Recovery Scale</u>                                   |                  |                 |                 |
| Stress Composite                                                     | 7.7 ± 4.0        | 7.8 ± 4.1       | 15.3 ± 0.6 *†   |
| Recovery Composite                                                   | 13.8 ± 3.8       | 11.0 ± 3.7      | 11.0 ± 1.0      |
| NASA-TLX Average                                                     | 55.4 ± 9.3       | 51.0 ± 10.3     | 52.0 ± 20.0     |
| <u>Fatigue</u>                                                       |                  |                 |                 |
| Pre-sleep fatigue                                                    | 4.0 ± 1.0        | 3.5 ± 0.7       | 4.6 ± 1.3       |
| Post-sleep fatigue                                                   | 3.9 ± 1.0        | 3.7 ± 0.9       | 3.9 ± 0.9       |
| <u>DASS-21</u>                                                       |                  |                 |                 |
| Depression                                                           | 7.2, 4.0 ± 10    | 4.4, 4.0 ± 4    | 18, 24.0 ± 26 † |
| Anxiety                                                              | 8.9, 8.0 ± 12    | 5.2, 4.0 ± 6    | 14.7, 4.0 ± 6   |
| Stress                                                               | 12.2, 10.0 ± 16  | 12.4, 14.0 ± 4  | 22.0, 22.0 ± 4  |

Values are mean ± SD except for DASS-21: mean, median ± interquartile range. DASS: Depression Anxiety and Stress Scale; DELCOM: delayed completion of BMT; DIS: discharged from BMT; ON-P: on-pathway, completed BMT on time, NASA-TLX: NASA Task Load Index. \*  $p < 0.05$  vs on-pathway, †  $p < 0.05$  vs delayed completion.

**Supplementary Table S2:** Estimated cost of training wastage during basic military training.

| Training Outcome                    | %  | Incidence per 1000 | Cost per Recruit | Cost                  |
|-------------------------------------|----|--------------------|------------------|-----------------------|
| Discharge <sup>^</sup>              | 10 | 100                | \$47,000         | \$4,700,000.00        |
| Delayed completion <sup>&amp;</sup> | 9  | 90                 | \$5,100          | \$ 459,000.00         |
|                                     |    |                    | <b>Total</b>     | <b>\$5,159,000.00</b> |

<sup>^</sup> Cost of discharge: estimated recruitment and training cost = \$47,000 (AUD) per recruit based on cost estimates by Rudzki et al (1999) and adjusted for inflation to 2021. The full cost of the 12-week BMT course has been attributed to discharge as there is no ability to replace the discharged recruit with a new recruit into that BMT session. <sup>&</sup> Delayed completion was assumed to be two additional weeks of training per recruit.
